# Supplementary material for: Safety of extended interval dosing immune checkpoint inhibitors: a multicenter cohort study
Source: PubMed Central journal article supplement — J Natl Cancer Inst. 2023 Apr 12;115(7):796–804. doi: 10.1093/jnci/djad061 (PMC10323889; doi:10.1093/jnci/djad061), 2023-04-12
Supplement: djad061_supplementary_data.pdf [file djad061_supplementary_data.pdf]

## Supplementary Material

**Supplementary Table 1.** Contributing centers.

| Center                                                     | Location    | No. patients enrolled | % Total cohort |
|------------------------------------------------------------|-------------|-----------------------|----------------|
| Ospedali Riuniti di Ancona                                 | Ancona      | 63                    | 7.6            |
| Azienda Ospedaliera Santi Antonio e Biagio e Cesare Arrigo | Alessandria | 10                    | 1.2            |
| Azienda Ospedaliera Universitaria Policlinico di Bari      | Bari        | 33                    | 4              |
| Policlinico Universitario Monserrato Casula                | Cagliari    | 14                    | 1.7            |
| Policlinico Campus Biomedico                               | Roma        | 41                    | 4.9            |
| Azienda Ospedaliera Universitaria Careggi                  | Firenze     | 50                    | 6              |
| Ospedale SS Annunziata                                     | Chieti      | 9                     | 1.1            |
| Centro di Riferimento Oncologico di Aviano                 | Aviano      | 34                    | 4.1            |
| Geneva University Hospital                                 | Geneva      | 2                     | 0.2            |
| IRCCS Ospedale Policlinico San Martino                     | Genova      | 149                   | 17.9           |
| INT IRCCS SS Oncologia Medica Toraco-Polmonare             | Milano      | 42                    | 5              |
| INT IRCCS SS Oncologia Medica GenitoUrinaria               | Milano      | 20                    | 2.4            |
| INT IRCCS Fondazione Pascale                               | Napoli      | 30                    | 3.6            |
| INT IRCCS Istituto Regina Elena                            | Roma        | 10                    | 1.2            |
| Ospedale San Salvatore                                     | L'Aquila    | 10                    | 1.2            |
| Ospedale S.M. Goretti                                      | Latina      | 12                    | 1.4            |
| Ospedale Generale Provinciale                              | Macerata    | 7                     | 0.8            |
| Ospedale San Gerardo                                       | Monza       | 30                    | 3.6            |
| AOU Luigi Vanvitelli                                       | Napoli      | 3                     | 0.4            |
| Ospedale Michele e Pietro Ferrero ASL CN2                  | Verduno     | 2                     | 0.2            |
| Policlinico Fondazione IRCCS Ca' Granda                    | Milano      | 10                    | 1.2            |
| Ospedale Santa Maria delle Croci                           | Ravenna     | 8                     | 1              |
| AOU Sant'Andrea                                            | Roma        | 26                    | 3.1            |
| Erasmus University Medical Center                          | Rotterdam   | 78                    | 9.4            |
| Policlinico Le Scotte UOC Immunoterapia Oncologica         | Siena       | 22                    | 2.6            |
| Ospedale Santa Chiara                                      | Trento      | 22                    | 2.6            |
| Policlinico Umberto I                                      | Roma        | 15                    | 1.8            |
| Azienda Ospedaliera Universitaria di Verona                | Verona      | 16                    | 1.9            |
| Ospedale di Circolo                                        | Varese      | 66                    | 7.9            |

**Supplementary Table 2.** Baseline clinical characteristics by treatment starting (canonical vs extended).

| Characteristic                                     | Upfront CD (%) | Upfront ED (%) |
|----------------------------------------------------|----------------|----------------|
| No. (n = 812)                                      | 550 (67.7)     | 262 (32.3)     |
| Age, median (range), y                             | 67 (26-93)     | 67 (28-94)     |
| Gender                                             |                |                |
| Female                                             | 189 (34.4)     | 100 (38.2)     |
| Male                                               | 361 (65.6)     | 162 (61.8)     |
| ECOG-PS                                            |                |                |
| 0-1                                                | 524 (95.3)     | 241 (92)       |
| ≥ 2                                                | 24 (4.4)       | 21 (8)         |
| Unknown                                            | 2 (0.3)        | 0              |
| Smoking status                                     |                |                |
| Current                                            | 98 (17.8)      | 40 (15.3)      |
| Former                                             | 241 (43.8)     | 84 (32)        |
| Never                                              | 211 (38.4)     | 138 (52.7)     |
| Treatment setting                                  |                |                |
| First line                                         | 264 (48)       | 116 (44.3)     |
| ≥ 2 <sup>nd</sup> line                             | 198 (36)       | 85 (32.4)      |
| Adjuvant                                           | 88 (16)        | 61 (23.3)      |
| Number of metastatic sites <sup>a</sup>            |                |                |
| <2                                                 | 129 (27.9)     | 42 (20.9)      |
| ≥ 2                                                | 287 (62.1)     | 132 (65.7)     |
| Unknown                                            | 46 (10)        | 27 (13.4)      |
| Surgery <sup>b</sup>                               |                |                |
| Yes                                                | 357 (64.9)     | 198 (75.6)     |
| No                                                 | 193 (35.1)     | 64 (24.4)      |
| Concomitant radiotherapy <sup>c</sup>              |                |                |
| Yes                                                | 107 (19.5)     | 49 (18.7)      |
| No                                                 | 440 (80)       | 213 (81.3)     |
| Unknown                                            | 3 (0.5)        | 0              |
| Type of ICI                                        |                |                |
| Pembrolizumab                                      | 211 (38.4)     | 61 (23.3)      |
| Nivolumab                                          | 339 (61.6)     | 201 (76.7)     |
| Tumor type                                         |                |                |
| NSCLC                                              | 172 (31.3)     | 32 (12.2)      |
| Melanoma                                           | 270 (49.1)     | 41 (15.6)      |
| Renal                                              | 100 (18.2)     | 186 (71.1)     |
| Other                                              | 8 (1.4)        | 3 (1.1)        |
| irAEs onset                                        |                |                |
| Yes                                                | 303 (55.1)     | 108 (41.2)     |
| No                                                 | 247 (44.9)     | 154 (58.8)     |
| Treatment cycles, median (range), No. <sup>d</sup> | 13 (1-121)     | 7 (1-44)       |

<sup>a</sup>Percentage calculated on the number of patients with metastatic cancer. <sup>b</sup>Surgery refers to resection of primitive tumor or metastatic site or both. <sup>c</sup>Radiotherapy concomitant to ICIs refers to primitive tumor or metastatic site or both. <sup>d</sup>Upfront CD treatment is Q3W (pembrolizumab) or Q2W (nivolumab), upfront ED treatment is Q6W (pembrolizumab) or Q4W (nivolumab).

CD, canonical interval dosing; ECOG-PS, Eastern Operative Oncology Group-Performance status; ED, extended interval dosing; ICI, immune checkpoint inhibitor; irAEs, immune related adverse events, NSCLC, non-small cell lung cancer.

**Supplementary Table 3.** Baseline clinical characteristics by irAEs onset.

| Characteristics                         | irAEs (%)  | No irAEs (%) |
|-----------------------------------------|------------|--------------|
| No. (n = 812)                           | 411 (50.6) | 401 (49.4)   |
| Age, median (range), y                  | 67 (33-90) | 67 (26-94)   |
| Gender                                  |            |              |
| Female                                  | 149 (36.3) | 140 (34.9)   |
| Male                                    | 262 (63.7) | 261 (65.1)   |
| ECOG-PS                                 |            |              |
| 0-1                                     | 393 (95.6) | 372 (93)     |
| ≥ 2                                     | 17 (4.1)   | 23 (6)       |
| Smoking Status                          |            |              |
| Current                                 | 82(20)     | 56 (14)      |
| Former                                  | 152 (37)   | 173 (43.1)   |
| Never                                   | 177 (43)   | 172 (42.9)   |
| Treatment setting                       |            |              |
| First line                              | 208 (50.6) | 172 (42.9)   |
| ≥ 2 <sup>nd</sup> line                  | 124 (30.2) | 159 (39.7)   |
| Adjuvant                                | 79 (19.2)  | 70 (17.4)    |
| Number of metastatic sites <sup>a</sup> |            |              |
| < 2                                     | 86 (26)    | 85 (25.7)    |
| ≥ 2                                     | 209 (63)   | 210 (63.4)   |
| Unknown                                 | 37 (11)    | 36 (10.9)    |
| Surgery <sup>b</sup>                    |            |              |
| Yes                                     | 288 (70.1) | 267 (66.6)   |
| No                                      | 123 (29.9) | 134 (33.4)   |
| Concomitant radiotherapy <sup>c</sup>   |            |              |
| Yes                                     | 79 (19.2)  | 77 (19)      |
| No                                      | 329 (80)   | 324 (81)     |
| Unknown                                 | 3 (0.8)    | 0            |
| Type of ICI                             |            |              |
| Pembrolizumab                           | 128 (31.1) | 144 (35.9)   |
| CD                                      | 115 (28)   | 96 (23.9)    |
| ED                                      | 13 (3.1)   | 48 (12)      |
| Nivolumab                               | 283 (68.9) | 257 (64.1)   |
| CD                                      | 188 (45.8) | 151 (37.7)   |
| ED                                      | 95 (23.1)  | 106 (26.4)   |

<sup>a</sup>Percentage calculated on the number of patients with metastatic cancer. <sup>b</sup>Surgery refers to resection of primitive tumor or metastatic site or both. <sup>c</sup>Radiotherapy concomitant to ICIs refers to primitive tumor or metastatic site or both.

CD, canonical interval dosing; ECOG-PS, Eastern Operative Oncology Group-Performance status; ED, extended interval dosing; ICI, immune checkpoint inhibitor; irAEs, immune related adverse events.

**Supplementary Table 4.** Toxicity of *upfront* canonical interval dosing ICI, by tumor type.

|                          | All (%)<br>n=550 |             | NSCLC (%)<br>n=172 |         | Melanoma (%)<br>n=270 |             | Renal (%)<br>n=100 |       | Other (%)<br>n=8 |             |
|--------------------------|------------------|-------------|--------------------|---------|-----------------------|-------------|--------------------|-------|------------------|-------------|
|                          | any              | G3-G4       | any                | G3-G4   | any                   | G3-G4       | any                | G3-G4 | any              | G3-G4       |
| Patients with irAEs      | 225<br>(40.9)    | 17<br>(3.1) | 67<br>(38.9)       | 3 (1.7) | 121<br>(44.8)         | 10<br>(3.7) | 33<br>(33)         | 2 (2) | 4 (50)           | 2 (25)      |
| <b>Spectrum of irAEs</b> |                  |             |                    |         |                       |             |                    |       |                  |             |
| Thyroiditis              | 69<br>(12.6)     | 1 (0.1)     | 18<br>(10.5)       | 0 (0)   | 39 (14.5)             | 0 (0)       | 9 (9)              | 1 (1) | 3<br>(37.5)      | 0 (0)       |
| Diarrhea/colitis         | 46<br>(8.4)      | 3 (0.5)     | 15<br>(8.7)        | 1 (0.6) | 26 (9.7)              | 2 (0.7)     | 4 (4)              | 0 (0) | 1<br>(12.5)      | 0 (0)       |
| Endocrine                | 18<br>(3.3)      | 2 (0.3)     | 5 (2.9)            | 0 (0)   | 11 (4.1)              | 1 (0.4)     | 0 (0)              | 0 (0) | 2 (25)           | 1<br>(12.5) |
| Hepatitis                | 26<br>(4.7)      | 5 (0.9)     | 8 (4.6)            | 2 (1.2) | 17 (6.3)              | 3 (1.1)     | 1 (1)              | 0 (0) | 0 (0)            | 0 (0)       |
| Neural                   | 8 (1.5)          | 0 (0)       | 6 (3.5)            | 0 (0)   | 2 (0.7)               | 0 (0)       | 0 (0)              | 0 (0) | 0 (0)            | 0 (0)       |
| Arthralgia               | 45<br>(8.2)      | 1 (0.1)     | 15<br>(8.7)        | 0 (0)   | 25 (9.3)              | 1 (0.4)     | 5 (5)              | 0 (0) | 0 (0)            | 0 (0)       |
| Asthenia                 | 57<br>(10.4)     | 0 (0)       | 17<br>(9.9)        | 0 (0)   | 32 (11.9)             | 0 (0)       | 7 (7)              | 0 (0) | 1<br>(12.5)      | 0 (0)       |
| Dermatitis               | 77<br>(14)       | 4 (0.7)     | 19<br>(11)         | 0 (0)   | 45 (16.7)             | 3 (1.1)     | 12<br>(12)         | 1 (1) | 1<br>(12.5)      | 1<br>(12.5) |
| Pneumonitis              | 12<br>(2.2)      | 0 (0)       | 7 (4.1)            | 0 (0)   | 2 (0.7)               | 0 (0)       | 3 (3)              | 0 (0) | 0 (0)            | 0 (0)       |
| Other                    | 23<br>(4.2)      | 1 (0.1)     | 6 (3.5)            | 0 (0)   | 11 (4.1)              | 0 (0)       | 3 (3)              | 0 (0) | 3<br>(37.5)      | 1<br>(12.5) |

ICI, Immune checkpoint inhibitor; irAEs, Immune-related adverse events; NSCLC, non-small cell lung cancer.

**Supplementary Table 5.** Toxicity of extended interval dosing ICI at time of first switching, by tumor type.

|                                  | All (%)<br>n=550 |         | NSCLC (%)<br>n=172 |         | Melanoma (%)<br>n=270 |         | Renal (%)<br>n=100 |       | Other (%)<br>n=8 |       |
|----------------------------------|------------------|---------|--------------------|---------|-----------------------|---------|--------------------|-------|------------------|-------|
|                                  | any              | G3-G4   | any                | G3-G4   | any                   | G3-G4   | any                | G3-G4 | any              | G3-G4 |
| Patients with irAEs <sup>a</sup> | 77 (15)          | 7 (1.4) | 22 (14.9)          | 3 (2)   | 35 (13.4)             | 2 (0.8) | 20 (20.7)          | 2 (2) | 0 (0)            | 0 (0) |
| <b>Spectrum of irAEs</b>         |                  |         |                    |         |                       |         |                    |       |                  |       |
| Thyroiditis                      | 16 (3.1)         | 1 (0.2) | 7 (4.7)            | 0 (0)   | 7 (2.7)               | 1 (0.4) | 2 (2.1)            | 0 (0) | 0 (0)            | 0 (0) |
| Diarrhea/colitis                 | 17 (3.3)         | 3 (0.6) | 7 (4.7)            | 2 (1.4) | 7 (2.7)               | 0 (0)   | 3 (3.1)            | 1 (1) | 0 (0)            | 0 (0) |
| Endocrine                        | 2 (0.4)          | 0 (0)   | 1 (0.7)            | 0 (0)   | 1 (0.4)               | 0 (0)   | 0 (0)              | 0 (0) | 0 (0)            | 0 (0) |
| Hepatitis                        | 6 (1.2)          | 0 (0)   | 1 (0.7)            | 0 (0)   | 3 (1.2)               | 0 (0)   | 2 (2.1)            | 0 (0) | 0 (0)            | 0 (0) |
| Neural                           | 2 (0.4)          | 0 (0)   | 0 (0)              | 0 (0)   | 1 (0.4)               | 0 (0)   | 1 (1)              | 0 (0) | 0 (0)            | 0 (0) |
| Arthralgia                       | 12 (2.3)         | 1 (0.2) | 2 (1.4)            | 0 (0)   | 8 (3.1)               | 1 (0.4) | 2 (2.1)            | 0 (0) | 0 (0)            | 0 (0) |
| Asthenia                         | 26 (5.1)         | 1 (0.2) | 7 (4.7)            | 0 (0)   | 11 (4.2)              | 0 (0)   | 8 (8.2)            | 1 (1) | 0 (0)            | 0 (0) |
| Dermatitis                       | 17 (3.3)         | 0 (0)   | 1 (0.7)            | 0 (0)   | 10 (3.8)              | 0 (0)   | 6 (6.2)            | 0 (0) | 0 (0)            | 0 (0) |
| Pneumonitis                      | 3 (0.6)          | 1 (0.2) | 1 (0.7)            | 1 (0.6) | 0 (0)                 | 0 (0)   | 2 (2.1)            | 0 (0) | 0 (0)            | 0 (0) |
| Other                            | 5 (1)            | 0 (0)   | 0 (0)              | 0 (0)   | 4 (1.5)               | 0 (0)   | 1 (1)              | 0 (0) | 0 (0)            | 0 (0) |

<sup>a</sup>irAE data (at time of first switch) missing for 40 patients (24 NSCLC, 11 melanoma, 3 renal, 2 other).

ICI, Immune checkpoint inhibitor; irAEs, Immune-related adverse events; NSCLC, non-small cell lung cancer.

**Supplementary Table 6.** Long-term toxicity of extended interval dosing ICI (including all cycles after switching), by tumor type.

|                                  | All (%)<br>n=550 |             | NSCLC (%)<br>n=172 |         | Melanoma (%)<br>n=270 |             | Renal (%)<br>n=100 |         | Other (%)<br>n=8 |       |
|----------------------------------|------------------|-------------|--------------------|---------|-----------------------|-------------|--------------------|---------|------------------|-------|
|                                  | any              | G3-G4       | any                | G3-G4   | any                   | G3-G4       | any                | G3-G4   | any              | G3-G4 |
| Patients with irAEs <sup>a</sup> | 179<br>(37.1)    | 23<br>(4.8) | 54<br>(41.5)       | 7 (5.4) | 87 (34.7)             | 11<br>(4.4) | 38<br>(39.6)       | 5 (5.2) | 0 (0)            | 0 (0) |
| <b>Spectrum of irAEs</b>         |                  |             |                    |         |                       |             |                    |         |                  |       |
| Thyroiditis                      | 40<br>(8.3)      | 1 (0.2)     | 18<br>(13.8)       | 0 (0)   | 18 (7.2)              | 1 (0.4)     | 4 (4.2)            | 0 (0)   | 0 (0)            | 0 (0) |
| Diarrhea/colitis                 | 46<br>(9.5)      | 6 (1.2)     | 15<br>(11.4)       | 3 (2.3) | 21 (8.4)              | 2 (0.8)     | 10<br>(10.4)       | 1 (1)   | 0 (0)            | 0 (0) |
| Endocrine                        | 12<br>(2.5)      | 2 (0.4)     | 2 (1.5)            | 0 (0)   | 10 (4)                | 2 (0.8)     | 0 (0)              | 0 (0)   | 0 (0)            | 0 (0) |
| Hepatitis                        | 13<br>(2.7)      | 1 (0.2)     | 1 (0.8)            | 0 (0)   | 10 (4)                | 1 (0.4)     | 2 (2.1)            | 0 (0)   | 0 (0)            | 0 (0) |
| Neural                           | 5 (1)            | 1 (0.2)     | 1 (0.8)            | 0 (0)   | 3 (1.2)               | 1 (0.4)     | 1 (1)              | 0 (0)   | 0 (0)            | 0 (0) |
| Arthralgia                       | 46<br>(9.5)      | 2 (0.4)     | 9 (6.9)            | 0 (0)   | 25 (10)               | 2 (0.8)     | 12<br>(12.5)       | 0 (0)   | 0 (0)            | 0 (0) |
| Asthenia                         | 53<br>(10.9)     | 1 (0.2)     | 16<br>(12.2)       | 0 (0)   | 24 (9.6)              | 0 (0)       | 13<br>(13.5)       | 1 (1)   | 0 (0)            | 0 (0) |
| Dermatitis                       | 62<br>(12.8)     | 6 (1.2)     | 15<br>(11.5)       | 2 (1.5) | 29 (11.6)             | 2 (0.8)     | 18<br>(18.7)       | 3 (3.2) | 0 (0)            | 0 (0) |
| Pneumonitis                      | 13<br>(2.7)      | 3 (0.6)     | 4 (3.1)            | 3 (2.3) | 5 (2)                 | 0 (0)       | 4 (4.2)            | 0 (0)   | 0 (0)            | 0 (0) |
| Other                            | 22<br>(4.5)      | 1 (0.2)     | 5 (3.8)            | 0 (0)   | 11 (4.4)              | 1 (0.4)     | 6 (6.2)            | 0 (0)   | 0 (0)            | 0 (0) |

<sup>a</sup>irAE data (at time of first switch and after) missing for 67 patients (42 NSCLC, 19 melanoma, 4 renal, 2 other).  
ICI, Immune checkpoint inhibitor; irAEs, Immune-related adverse events; NSCLC, non-small cell lung cancer.

**Supplementary Table 7.** Toxicity of *upfront* extended interval dosing ICI, by tumor type.

|                          | All (%)<br>n=262 |             | NSCLC (%)<br>n=32 |           | Melanoma (%)<br>n=186 |           | Renal (%)<br>n=41 |             | Other (%)<br>n=3 |           |
|--------------------------|------------------|-------------|-------------------|-----------|-----------------------|-----------|-------------------|-------------|------------------|-----------|
|                          | any              | G3-<br>G4   | any               | G3-<br>G4 | any                   | G3-<br>G4 | any               | G3-<br>G4   | any              | G3-<br>G4 |
| Patients with irAEs      | 107<br>(40.8)    | 14<br>(5.3) | 6<br>(18.7)       | 1 (3.1)   | 91 (48.9)             | 8 (4.3)   | 10<br>(24.4)      | 5<br>(12.2) | 0 (0)            | 0 (0)     |
| <b>Spectrum of irAEs</b> |                  |             |                   |           |                       |           |                   |             |                  |           |
| Thyroiditis              | 26<br>(9.9)      | 3 (1.1)     | 1 (3.1)           | 0 (0)     | 22 (11.8)             | 2 (1.1)   | 3 (7.3)           | 1 (2.4)     | 0 (0)            | 0 (0)     |
| Diarrhea/colitis         | 32<br>(12.2)     | 2 (0.8)     | 2 (6.2)           | 0 (0)     | 26 (14)               | 1 (0.5)   | 4 (9.8)           | 1 (2.4)     | 0 (0)            | 0 (0)     |
| Endocrine                | 4 (1.5)          | 0 (0)       | 0 (0)             | 0 (0)     | 4 (2.2)               | 2 (1.1)   | 0 (0)             | 0 (0)       | 0 (0)            | 0 (0)     |
| Hepatitis                | 12<br>(4.6)      | 4 (1.5)     | 1 (3.1)           | 1 (3.1)   | 8 (4.3)               | 2 (1.1)   | 3 (7.3)           | 1 (2.4)     | 0 (0)            | 0 (0)     |
| Neural                   | 3 (1.1)          | 1 (0.4)     | 0 (0)             | 0 (0)     | 3 (1.6)               | 0 (0)     | 0 (0)             | 0 (0)       | 0 (0)            | 0 (0)     |
| Arthralgia               | 2 (0.8)          | 0 (0)       | 0 (0)             | 0 (0)     | 19 (10.2)             | 1 (0.5)   | 1 (2.4)           | 0 (0)       | 0 (0)            | 0 (0)     |
| Asthenia                 | 24<br>(9.2)      | 0 (0)       | 0 (0)             | 0 (0)     | 21 (11.3)             | 0 (0)     | 3 (7.3)           | 0 (0)       | 0 (0)            | 0 (0)     |
| Dermatitis               | 32<br>(12.2)     | 0 (0)       | 1 (3.1)           | 0 (0)     | 30 (16.1)             | 0 (0)     | 1 (2.4)           | 0 (0)       | 0 (0)            | 0 (0)     |
| Pneumonitis              | 16<br>(6.1)      | 3 (1.1)     | 2 (6.2)           | 0 (0)     | 11 (5.9)              | 1 (0.5)   | 3 (7.3)           | 2 (4.9)     | 0 (0)            | 0 (0)     |
| Other                    | 12<br>(4.6)      | 1 (0.4)     | 1 (3.1)           | 0 (0)     | 11 (5.9)              | 1 (0.5)   | 0 (0)             | 0 (0)       | 0 (0)            | 0 (0)     |

ICI, Immune checkpoint inhibitor; irAEs, Immune-related adverse events; NSCLC, non-small cell lung cancer.
